# Supplementary material
Source: PubMed Central journal article supplement (PMC9657895)

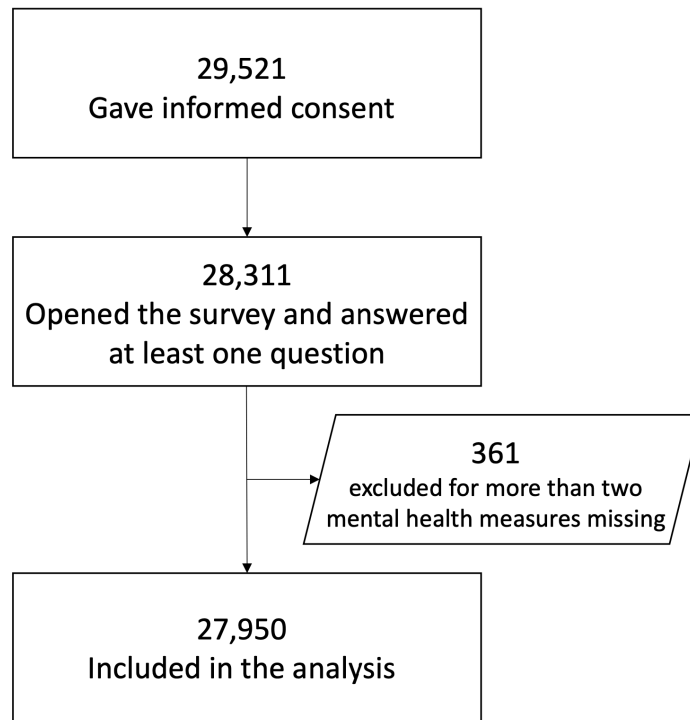

Supplemental Figure 1: Flowchart of participants

Supplement: mmc1.pdf [file mmc1.pdf]
